September 30, 2020

## Title: **SARS-CoV-2 Inactivation Potential of Metal Organic Framework Induced Photocatalysis**

Authors: Jason Ornstein<sup>1</sup>, Ray O.K. Ozdemir<sup>1</sup>, Anne Boehme<sup>1</sup>, Farid Nouar<sup>2</sup>, Christian Serre<sup>2</sup>, Daniel N. Ackerman<sup>3</sup>, Vicki L. Herrera<sup>3</sup>, and Joshua L. Santarpia<sup>3,4</sup>

### Institutions:

[1] framergy, Inc., College Station, TX, USA

[2] Institut des Matériaux Poreux de Paris, ESPCI Paris, Ecole Normale Supérieure, PSL University, France

[3] National Strategic Research Institute, Omaha, NE, USA

[4] University of Nebraska Medical Center, Omaha, NE, USA

Abstract: As the world recovers from the lockdown imposed by the Severe Acute Respiratory Syndrome Coronavirus 2 (SARS-CoV-2) pandemic, returning to shared indoor spaces is considered a formidable risk. It is now clear that transmission of SARS-CoV-2 is driven by respiratory microdroplets expelled by infected persons, which can become suspended in the air. Several layering technologies are being explored to mitigate indoor transmission in the hopes of re-opening business, schools and transportation systems. Here we coupled the water adsorptive and photocatalytic capacity of novel Metal Organic Frameworks (MOFs) to demonstrate the capture and inactivation of SARS-CoV-2. Discussion is given on the methods of analysis and the differences between the photocatalytic activity of several MOFs, and the difference between MOF induced photocatalysis and ultra violet photolysis of SARS-CoV-2. Our results are intended to provide support to industry looking for alternative methods secure indoor spaces.

Editorial: The ability to prevent the accumulation, through ongoing passive inactivation, of Severe Acute Respiratory Syndrome Coronavirus 2 (SARS-CoV-2) on surfaces that may pose ongoing infection risk may be critical in indoor confined spaces, especially when occupied by infected patients. Previous studies have shown that dehumidification systems can collect and spread SARS-COV-2.[1] Photocatalysis on surfaces where respiratory droplets are likely to accumulate is one possible method for rendering dehumidification systems safe. We propose using the desiccant Metal Organic Frameworks (MOFs), which can also function as a photocatalyst to break down adsorbed guest molecules, may lead to viral inactivation, for hospital dehumidification systems.

The COVID-19 pandemic has demanded a large number of airborne infection isolation rooms (AIIR), which has put enormous stress on our medical infrastructure. Because closed-loop air flow dehumidification systems can turn any room into a negative pressure isolation room, researchers from the Republic of South Korea were able to demonstrate that this system could be

NOTE: This preprint reports new research that has not been certified by peer review and should not be used to guide clinical practice.

used as an AIIR during the MERS outbreak.[2] In parallel, the microporous crystalline Ti dicarboxylate MOF MIL-125(Ti)-NH<sub>2</sub>, [3] has been shown to improve dehumidification efficiency with heat pumps, [4][5] and Ti-MOFs are known to be efficient photocatalysts.[6] Given these properties, we tested the ability of this MOF to inactivate SARS-CoV-2 through UV-irradiation.

MIL-125(Ti)-NH<sub>2</sub> is built up from Ti<sub>8</sub>O<sub>8</sub>(OH)<sub>4</sub> oxoclusters connected via amino-terephthalate ligands to produce a microporous cubic 3D porous architecture. It can be produced as nano- or micro-particles under ambient pressure and solvothermal conditions and exhibits a good stability in the presence of water while being suitable for a wide range of potential applications. The MOF was produced, activated and characterized according to previous studies. The fine yellowish powder was then mixed with deionised (DI) water at 5 weight percent. 1 mL of the solution was dispersed evenly on a one inch by one inch reflective stainless steel coupon. The solution was then allowed to dry until all of the water evaporated. SARS-CoV-2 virus (BEI\_ USA-WA1/2020) cultivated in Vero-E6 cells and enumerated by median tissue culture infectious dose (TCID<sub>50</sub>) assay to be ~1x10<sup>5</sup> TCID<sub>50</sub>/mL. The MOF nano particles were then exposed to 100 μL of SARS-CoV-2 culture and exposed to UV-C light for 30 minutes. A control consisting of a stainless steel coupon and 100 μL of SARS-CoV-2 culture was also maintained for 30 minutes. As a point of comparison, UV-C light is currently used to sanitize face masks where the practice is to expose the mask for much longer durations to ensure viral inactivation.[7]

After the exposure, the sample was analyzed for remaining viral titer by TCID<sub>50</sub> and RNA content by Reverse Transcriptase PCR (RT-PCR) targeting the E gene of SARS-CoV-2 [8]. RT-PCR indicate only the presence of viral RNA, not the activity of the virus. Although significant reduction in viral RNA and inactivation of virus, by TCID<sub>50</sub>, was observed it could not be separated from the impacts of UV-C alone due to the choice of a reflective coupon substrate (Figure 1). It is likely that the reflectivity of the coupon increased the exposure intensity for the control coupon, compared to the MOF coated ones. However, compared to other photoactive MOF materials such as the iron(III) carboxylate MIL-127(Fe), also referred to as PCN-250(Fe), which was tested in the same experiment,[9] MIL-125(Ti)-NH<sub>2</sub> appears to exhibit additional inactivation (Figure 1).

### Residual Viral Titre and Initial Reduction in RNA after Exposure to UV-C

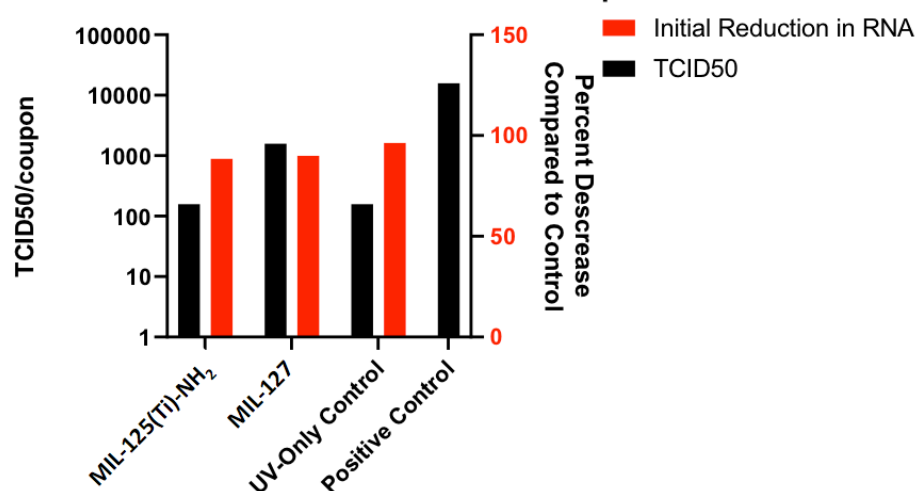

Figure 1. PCR and TCID50 test results showing SARS-CoV-2 Inactivation Coupon treated with MIL-125(Ti)-NH<sub>2</sub> demonstrates greater inactivation (by TCID50) when exposed to UV-C radiation than MIL-127(Fe), although reduction in RNA is identical, indicating RNA damage is not the primary means of inactivation.

It has been proposed previously that photocatalytic virus inactivation can be achieved through three distinct pathways, which prevent SARS-CoV-2 from initiating an infection: (i) nucleic acid DNA damage,[10] (ii) alteration to spike proteins or recognition proteins on the surface,[11] and (iii) virus' lipid membrane damage.[12] Direct UV damage to nucleic acid occurs at the wavelengths absorbed by the RNA in the germicidal UV region and can also be referred to as photolysis.[13] Photocatalysis, or oxidative degradation of organic material, on the other hand, can target the recognition proteins and the lipid membrane, while leaving some genetic material intact. The role of photocatalytic processes versus photolysis could not be determined by this study; however, this preliminary data indicates that photocatalytic activity was observed for MIL-125(Ti)-NH<sub>2</sub>, since greater inactivation by an order of magnitude was observed for MIL-125(Ti)-NH<sub>2</sub> than for MIL-127(Fe), even though initial reduction in RNA was similar.

MIL-177-HT is a microporous MOF built up from ca. 1.1 nm Ti oxide chains connected via 3,3',5,5'-tetracarboxydiphenylmethane ligands to produce a nanoporous honeycomb porous architecture. [14] The presence of the infinite Ti oxide chains, associated with a very high oxo/Ti ratio of 1.5, creates a continuous photoconductor pathway enabling longer charge separation under photo excitation. This provides significant advantages in terms of reactive species generation, which benefits to photocatalytic remediation applications. It can also be produced as ≈150 nm (length) nanorods under ambient pressure solvothermal conditions; it also exhibits a very good stability in the presence of water while being promising for a wide range of applications. [15][16]

The MOF was produced, activated and characterized according to previous studies.[17] The fine white powder was then mixed with DI water at 5 weight percent. 1 mL of the solution was dispersed evenly on a one inch by one inch [non-reflective coupon, as well as MIL-125(Ti)-NH<sub>2</sub> on a separate coupon and a control coupon with no MOF material. Coupons were inoculated with virus, as defined above. The sample was exposed to florescent light for 30 minutes. Most of the spectral power for florescent lights occur in the visible range.[18]

After the exposure, the sample was analyzed for remaining viral titer by TCID<sub>50</sub>. Noteworthy, MIL-177-HT achieved 50% virus inactivation (Figure 2). Room light alone had no effect on SARS-CoV-2 during our testing, and this is believed to be the first demonstration of the use of room light, which unlike UV-C, is not harmful to humans, to drive MOF photocatalysis of SARS-CoV-2, or any virus. The difference between MIL-125(Ti)-NH<sub>2</sub> and MIL-177-HT could arise from the photoconductive character of the latter.[17] This MOF exhibits a much longer life time of the separated charge under irradiation in comparison with MIL-125(Ti)-NH<sub>2</sub>. MIL-177-HT is thus the first of its kind to exhibit photoconductivity stemming from the titanium oxide building block.

**SARS-CoV-2 Inactivation by MOFs and Light**

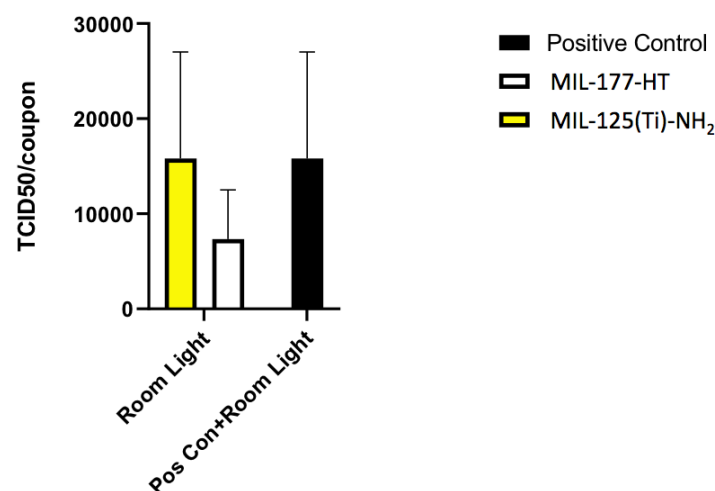

Figure 2. TCID<sub>50</sub> test results showing SARS-COV-2 Inactivation in Room Light- MIL-177-HT MOF-coated surfaces shows 50% reduction in viral titer after a 30 minute exposure to room light, compared to the control and MIL-125(Ti)-NH<sub>2</sub> coated coupons.

The results of these preliminary studies therefore suggest more testing should be done on the efficiency of MOF photocatalysis of SARS-CoV-2, and other viruses and biological contaminants. Based on these preliminary findings, the coupling of incredible water adsorptive capacity with a photocatalytic capability of MOFs could be a practical risk reduction solution in dehumidification systems in hospitals. This technology could also be applied in other confined spaces and to other negative air pressure systems such as air purifiers and breathing masks.

### Acknowledgements:

This approach benefits from work being done by framergy, Inc., under funding from the US Environmental Protection Agency, where Metal Organic Frameworks are being used to photocatalytically degrade per- and polyfluoroalkyl substances in an aqueous medium (Contract Number 68HERC20C0055).

### Materials and methods:

#### **Synthesis of MIL-125(Ti)-NH<sub>2</sub>**

MIL-125(Ti)-NH<sub>2</sub> was synthesized using 300 g of 2-aminoterephthalic acid (ligand), 150 mL Titanium (IV) isopropoxide 98+% (Ti(iPrO)<sub>4</sub>), 8.1 L DMF, 900 mL Methanol. A 10 L reactor was heated to 120°C. 300 g of ligand was dissolved in 4.5 L of DMF while stirring and heating in a glass container until a uniform solution was obtained. This solution was added to the heated reactor. Then, in a 500 mL glass flask, 150 mL of Titanium (IV) isopropoxide was dissolved in another 3.5 mL of DMF. To the reactor, 900 mL of methanol was added, along with 100 mL of DMF. This caused the ligand to completely dissolve. The dissolved titanium isopropoxide/DMF solution was added to the mixture in the reactor and the temperature of the oil surrounding the reactor, was increased to 150 °C. The mixture was stirred and heated in the reaction at 150°C for 48 hours where after it was cooled to room temperature. The yellow solid was then filtered using a Nutsche, washed in methanol and filtered once more, leaving a dry yellow powder.

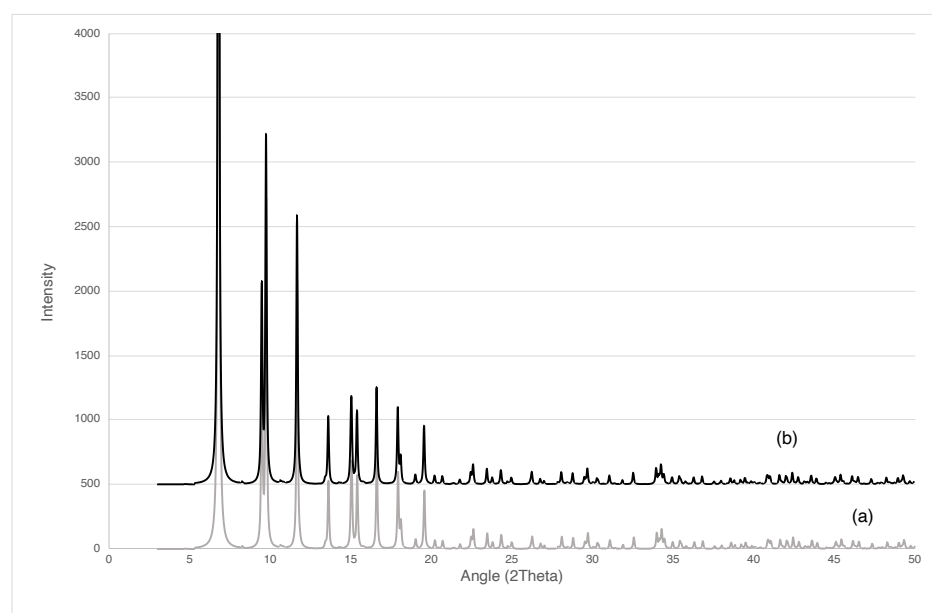

Figure 3. PXRD patterns of a) calculated MIL-125(Ti)-NH<sub>2</sub> and b) experimental MIL-125(Ti)-NH<sub>2</sub>

## Synthesis of MIL-177-HT

MIL-177-HT was synthesized using a 25 mL round bottom flask where 200 mg of H4mdip with 10 mL of formic acid was added and stirred at room temperature until it was a uniform solution. Following that, 400  $\mu$ L of Titanium (IV) isopropoxide 98+% (Ti(iPrO)<sub>4</sub>) was added drop wise using a micropipette. The reaction was heated under reflux for 24 hours and then cooled to room temperature. Then, the white solid was filtered using vacuum filtration and washed with ethanol, where after it was filtered once more. MIL-177-HT was prepared by grounding 200 mg of the MOF into a fine powder, which was transferred to a flat glass dish, and dispersed uniformly. It was then heated in an oven at 280 °C for 12 hours, forming a white powder.

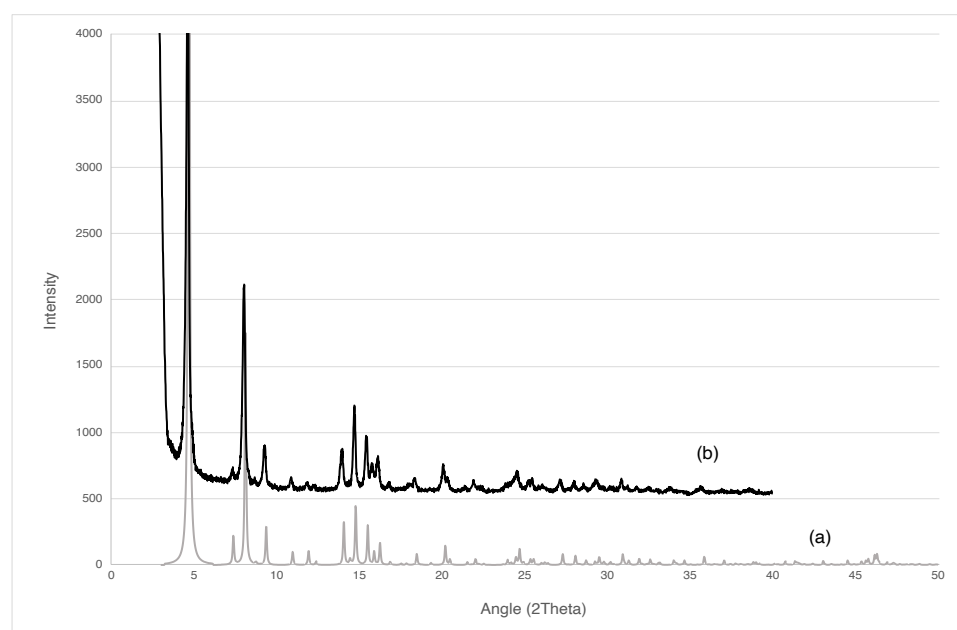

Figure 4. PXRD patterns of a) calculated MIL-177-HT and b) experimental MIL-177-HT

## Synthesis of MIL-127(Fe)

MIL-127(Fe) was synthesized using 6 L of DMF, 3 L acetic acid, 90 g of H4ABTC (azobenzene-tetracarboxylic acid), and 270 g of iron nitrate. A 10 L reactor was heated to 150°C. First, the 6 L DMF was combined with the 90 g H4ABTC. The solution was stirred at room temperature until it was a uniform solution. The solution was added to the 10 L reactor. Then, in another beaker, the acetic acid (3 L) and the iron nitrate (270 g) was combined and stirred until a uniform solution was obtained. The mixture was then added to the 10 L reactor as well. The final solution was heat at 150°C for 12 hours, where after it was cooled to room temperature. The dark brown solid crystals were then filtered using a Nutsche, washed in methanol and filtered once more, leaving a dry dark red powder.

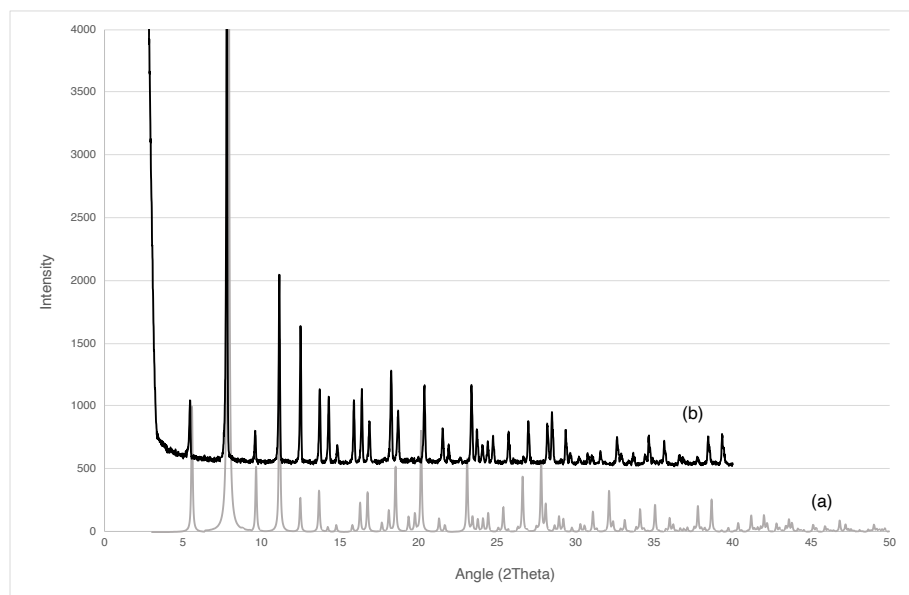

Figure 5. PXRD patterns of a) calculated MIL-127(Fe) and b) experimental MIL-127(Fe)

#### References:

- [1] Lu, Jianyun, et al. "COVID-19 outbreak associated with air conditioning in restaurant, Guangzhou, China, 2020." *Emerging infectious diseases* 26.7 (2020): 1628.
- [2] Huh, Kyungmin, Hyung-Shik Shin, and Kyong Ran Peck. "Emergent strategies for the next phase of COVID-19." *Infection & Chemotherapy* 52.1 (2020): 105-109.
- [3] Dan-Hardi, Meenakshi, et al. "A new photoactive crystalline highly porous titanium (IV) dicarboxylate." *Journal of the American Chemical Society* 131.31 (2009): 10857-10859.
- [4] Gordeeva, Larisa G., Marina V. Solovyeva, and Yuri I. Aristov. "NH<sub>2</sub>-MIL-125 as a promising material for adsorptive heat transformation and storage." *Energy* 100 (2016): 18-24.
- [5] Sohail, Muhammad, et al. "Synthesis of highly crystalline NH<sub>2</sub>-MIL-125 (Ti) with S-shaped water isotherms for adsorption heat transformation." *Crystal Growth & Design* 17.3 (2017): 1208-1213.
- [6] Assi, Hala, et al. "Titanium coordination compounds: from discrete metal complexes to metal–organic frameworks." *Chemical Society Reviews* 46.11 (2017): 3431-3452.
- [7] Shirbandi, Kiarash, et al. "Inactivation of Coronavirus with Ultraviolet Irradiation: What? How? Why?." (2020).

- [8] Corman, Victor, et al. "Diagnostic detection of Wuhan coronavirus 2019 by real-time RT-PCR." *Geneva: World Health Organization, January 13 (2020)*.
- [9] Dhakshinamoorthy, Amarajothi, et al. "Iron (III) metal–organic frameworks as solid Lewis acids for the isomerization of  $\alpha$ -pinene oxide." *Catalysis Science & Technology* 2.2 (2012): 324-330.
- [10] Sharma, Ranjana, et al. "Diversity and distribution of commensal fecal *Escherichia coli* bacteria in beef cattle administered selected subtherapeutic antimicrobials in a feedlot setting." *Applied and Environmental Microbiology* 74.20 (2008): 6178-6186.
- [11] Goulhen-Chollet, Florence, et al. "Monitoring the bactericidal effect of UV-A photocatalysis: a first approach through 1D and 2D protein electrophoresis." *Catalysis Today* 147.3-4 (2009): 169-172.
- [12] Maness, Pin-Ching, et al. "Bactericidal activity of photocatalytic TiO<sub>2</sub> reaction: toward an understanding of its killing mechanism." *Applied and environmental microbiology* 65.9 (1999): 4094-4098.
- [13] Bedell, Kurt, Adam H. Buchaklian, and Stanley Perlman. "Efficacy of an automated multiple emitter whole-room ultraviolet-C disinfection system against coronaviruses MHV and MERS-CoV." *infection control & hospital epidemiology* 37.5 (2016): 598-599.
- [14] Pinto, Rosana V., et al. "Tuning Cellular Biological Functions Through the Controlled Release of NO from a Porous Ti-MOF." *Angewandte Chemie* 132.13 (2020): 5173-5181.
- [15] Murillo, Beatriz, et al. "Tin-carboxylate MOFs for sugar transformation into methyl lactate." (2019).
- [16] Assi, Hala, et al. "Investigating the case of titanium (IV) carboxyphenolate photoactive coordination polymers." *Inorganic chemistry* 55.15 (2016): 7192-7199.
- [17] Wang, Sujing, et al. "A phase transformable ultrastable titanium-carboxylate framework for photoconduction." *Nature communications* 9.1 (2018): 1-9.
- [18] Bielski, Robert J., Joan Mayor, and Jane Rice. "Phototherapy with broad spectrum white fluorescent light: a comparative study." *Psychiatry research* 43.2 (1992): 167-175.
